# Supplementary material for: A three-dimensional geometric morphometric analysis of the morphological transformation of Caiman lower jaw during post-hatching ontogeny
Source: PeerJ journal article supplement (doi:10.7717/peerj.15548), 2023-07-12
Supplement: FigS1.pdf [file FigS1.pdf]

# *Caiman latirostris*

Min SVLdcl: 47.391 Max SVLdcl: 127.68

Min CS: 359.987

Max CS: 1127.316

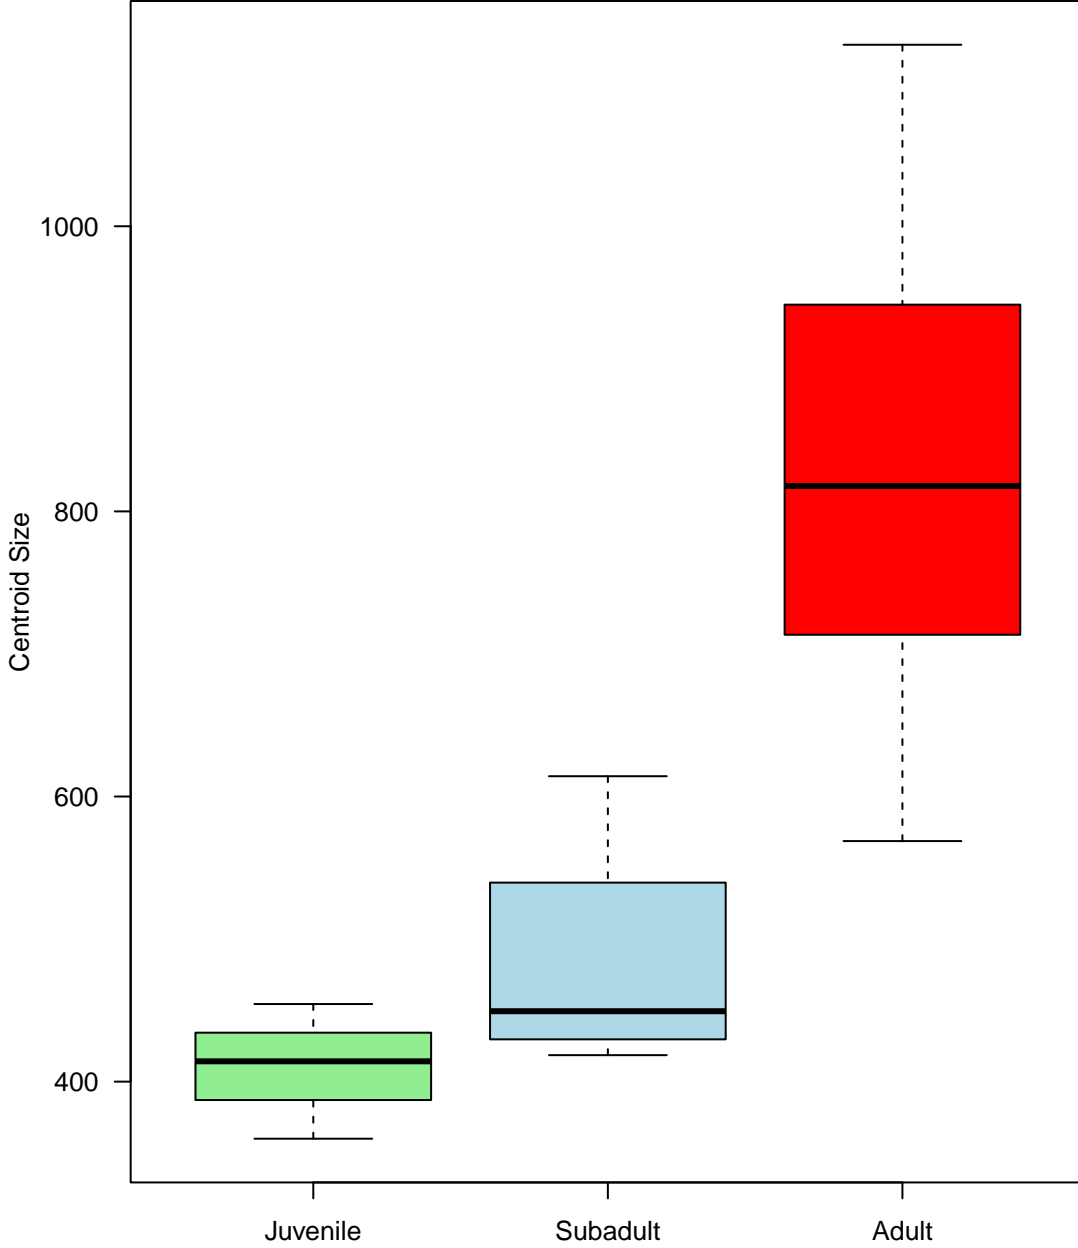

Amplitude Centroid Size: 767.328

Min ProcDist: 0.743

Max ProcDist: 1.097

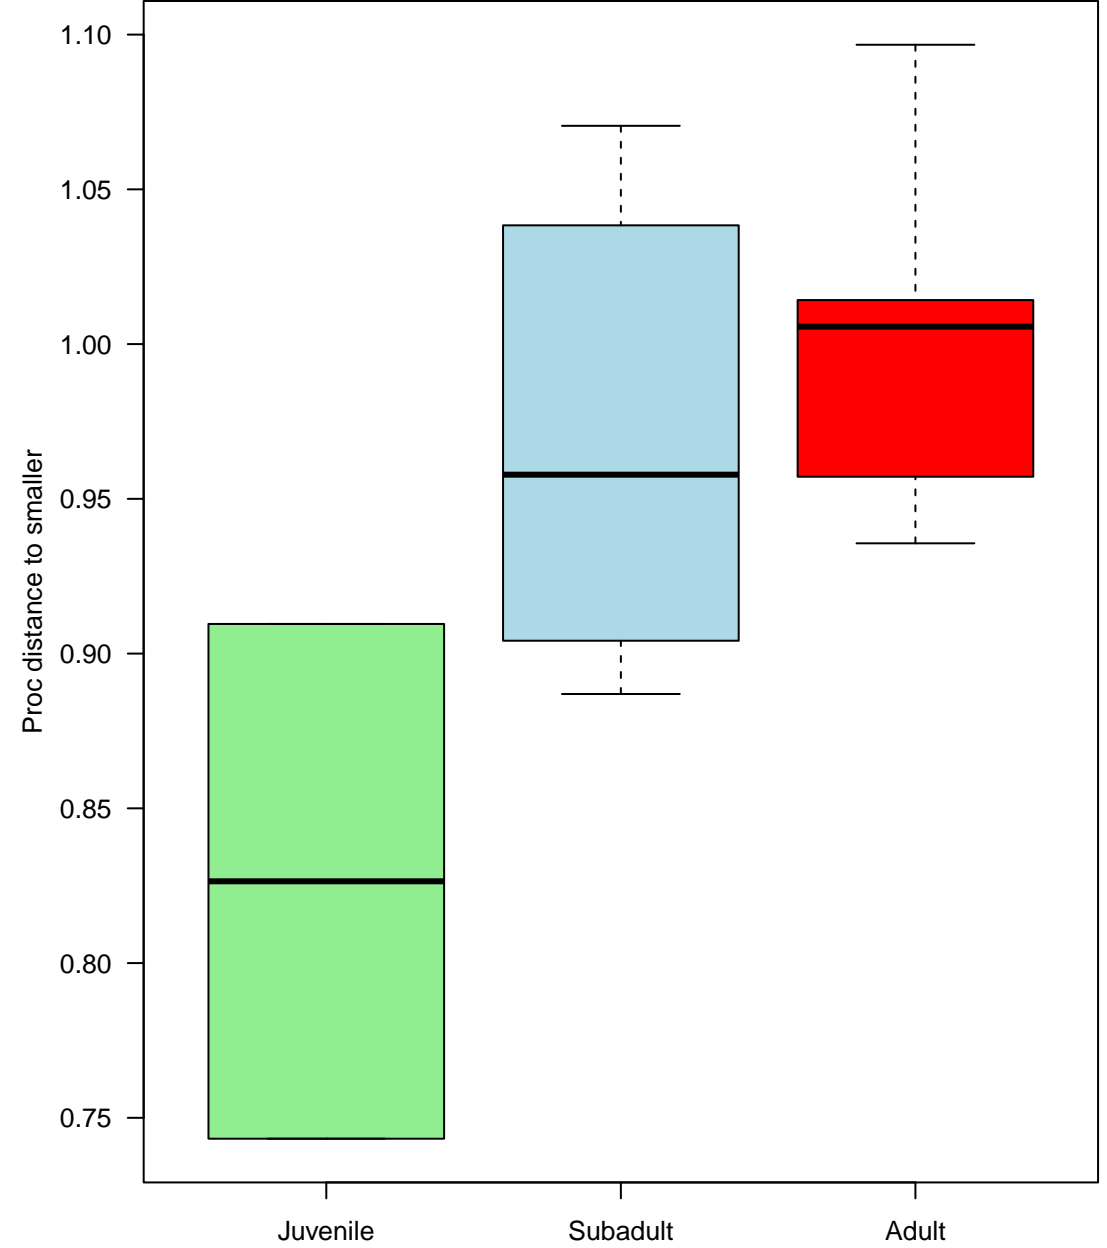

Amplitude procdist: 0.353 || from smaller to bigger: 1.097
