# Supplementary material for: A three-dimensional geometric morphometric analysis of the morphological transformation of Caiman lower jaw during post-hatching ontogeny
Source: PeerJ journal article supplement (doi:10.7717/peerj.15548), 2023-07-12
Supplement: FigS2.pdf [file FigS2.pdf]

# *Caiman yacare*

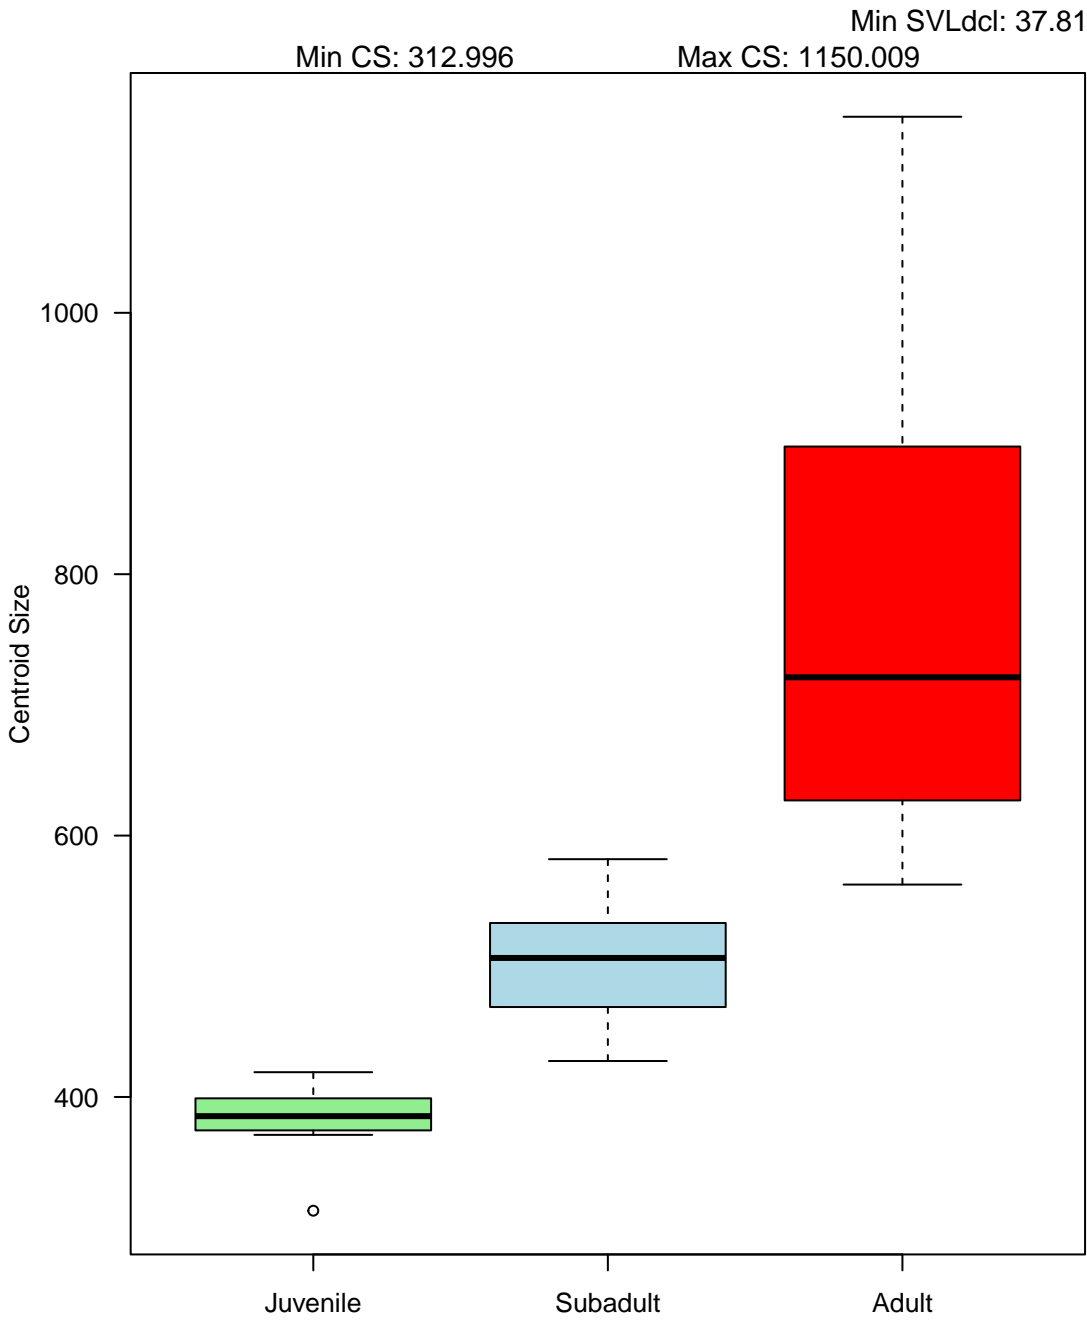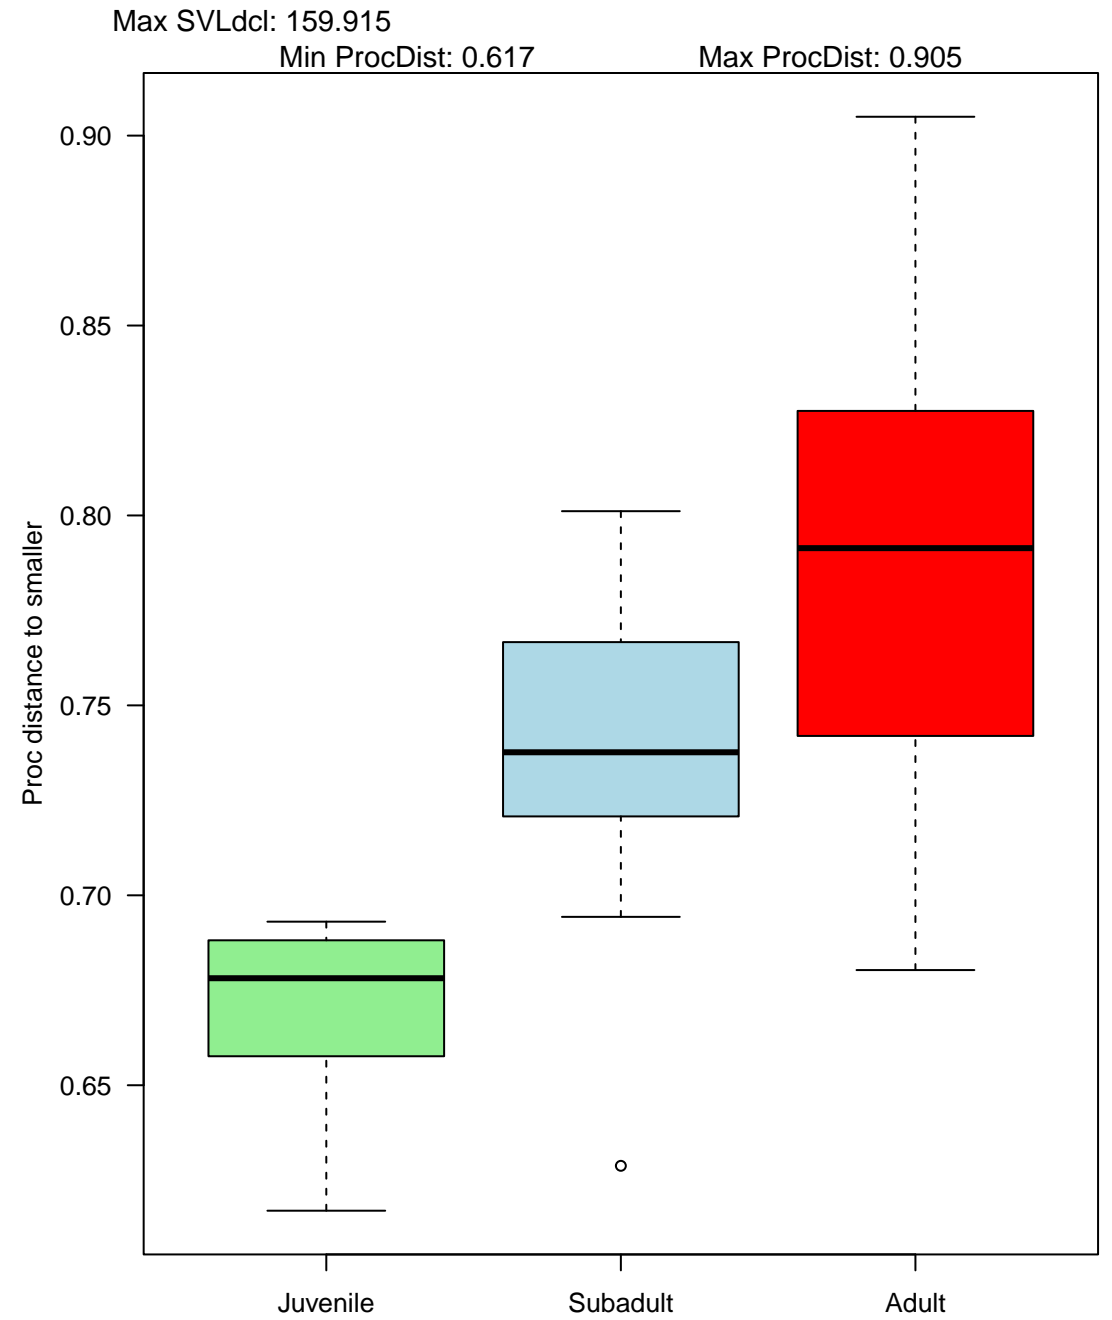

Amplitude Centroid Size: 837.012

Amplitude procdist: 0.288 || from smaller to bigger: 0.905
